# Supplementary material for: Polyoxometalate-based CuII/CoII complexes tuned using various metal–pyrazole loops: design, diverse architectures and catalytic activity toward the oxidation of thioether derivatives
Source: Royal Society of Chemistry journal article supplement (doi:10.1039/d2ce00074a), 2022-01-01
Supplement: d2ce00074a1.pdf [file d2ce00074a1.pdf]

# Various metal-pyrazole loops tuned polyoxometalate-based Cu<sup>II</sup>/Co<sup>II</sup> complexes: Design, diverse architectures and catalytic activity toward the oxidation of thioether derivatives

Jing-Yuan Zhang <sup>a, b ‡</sup>, Yu-Chen Zhang <sup>a ‡</sup>, Xiu-Li Wang <sup>a\*</sup>, Zhi-Han Chang <sup>a</sup>, Zhong Zhang <sup>a</sup>,  
Hong-Yan Lin <sup>a</sup>, Zi-Wei Cui <sup>a</sup>

**Table S1** Bond lengths [Å] and angles [°] for complex **1**

|                   |            |                  |            |
|-------------------|------------|------------------|------------|
| Cu(1)-O(1)        | 1.998(3)   | Cu(3)-O(4)       | 1.998(3)   |
| Cu(1)-O(2)        | 2.316(3)   | Cu(3)-O(4W)      | 1.957(3)   |
| Cu(1)-N(1)        | 1.948(4)   | Cu(3)-N(5)       | 1.967(4)   |
| Cu(1)-O(1W)       | 1.949(4)   | Cu(3)-N(6)       | 1.939(3)   |
| Cu(1)-N(2)        | 1.946(4)   | Cu(3)-O(5W)      | 2.549(3)   |
| Cu(2)-O(3)        | 2.012(3)   | Cu(4)-O(5W)      | 1.976(3)   |
| Cu(2)-O(2W)       | 2.304(3)   | Cu(4)-O(5)       | 1.943(3)   |
| Cu(2)-N(3)        | 1.960(4)   | Cu(4)-N(8)       | 1.928(4)   |
| Cu(2)-N(4)        | 1.948(4)   | Cu(4)-N(7)       | 1.920(4)   |
| Cu(2)-O(5W)       | 1.963(4)   | O(4W)-Cu(3)-O(4) | 86.83(13)  |
| O(4W)-Cu(3)-N(5)  | 167.63(14) | N(5)-Cu(3)-O(4)  | 81.78(14)  |
| N(6)-Cu(3)-O(4)   | 170.10(14) | N(6)-Cu(3)-O(4W) | 94.38(15)  |
| N(6)-Cu(3)-N(5)   | 97.67(15)  | O(5)-Cu(4)-O(5W) | 82.76(13)  |
| N(8)-Cu(4)-O(5W)  | 165.19(14) | N(8)-Cu(4)-O(5)  | 83.00(14)  |
| N(7)-Cu(4)-O(5W)  | 95.92(14)  | N(7)-Cu(4)-O(5)  | 173.73(14) |
| N(7)-Cu(4)-N(8)   | 98.67(15)  | N(1)-Cu(1)-O(1)  | 81.66(15)  |
| O(1)-Cu(1)-O(2)   | 99.93(12)  | N(1)-Cu(1)-O(2)  | 93.25(14)  |
| N(1)-Cu(1)-O(1W)  | 164.65(16) | O(1W)-Cu(1)-O(1) | 84.81(15)  |
| O(1W)-Cu(1)-O(2)  | 96.19(13)  | N(2)-Cu(1)-O(1)  | 167.05(15) |
| N(2)-Cu(1)-O(2)   | 93.00(14)  | N(2)-Cu(1)-N(1)  | 98.54(17)  |
| N(2)-Cu(1)-O(1W)  | 93.03(17)  | O(3)-Cu(2)-O(2W) | 107.32(14) |
| N(3)-Cu(2)-O(3)   | 161.37(15) | N(3)-Cu(2)-O(2W) | 91.31(14)  |
| N(3)-Cu(2)-O(3W)  | 94.73(17)  | N(4)-Cu(2)-O(3)  | 81.30(16)  |
| N(4)-Cu(2)-O(2W)  | 91.21(15)  | N(4)-Cu(2)-N(3)  | 98.15(17)  |
| N(4)-Cu(2)-O(3W)  | 166.38(16) | O(3W)-Cu(2)-O(3) | 85.09(16)  |
| O(3W)-Cu(2)-O(2W) | 92.90(15)  |                  |            |

Symmetry code for **1**: #1 -x, -y+1, -z+1

**Table S2** The detailed data for hydrogen bonds for complex **1**

|                     |        |                     |        |
|---------------------|--------|---------------------|--------|
| O(4W)-H(4WA)        | 0.8528 | O(2W)-H(2WA)        | 0.8672 |
| O(4W)-H(4WB)        | 0.8527 | O(2W)-H(2WB)        | 0.8663 |
| O(1W)-H(1WA)        | 0.8512 | O(1W)-H(1WB)        | 0.8510 |
| H(4WA)-O(4W)-H(4WB) | 104.3  | H(2WA)-O(2W)-H(2WB) | 103.7  |
| H(1WA)-O(1W)-H(1WB) | 104.5  | H(3WA)-O(3W)-H(3WB) | 98.5   |
| H(5WA)-O(5W)-H(5WB) | 104.5  | H(6WA)-O(6W)-H(6WB) | 104.5  |

**Table S3** Bond lengths [ $\text{\AA}$ ] and angles [ $^\circ$ ] for complex **2**

|                    |            |                     |            |
|--------------------|------------|---------------------|------------|
| Co(1)-O(2)         | 2.060(3)   | Co(1)-O(1)          | 2.151(3)   |
| Co(1)-O(3)#3       | 2.115(3)   | Co(1)-N(1)          | 2.088(4)   |
| Co(1)-O(1W)        | 2.118(3)   | Co(1)-N(2)#3        | 2.083(4)   |
| N(2)#3-Co(1)-O(1)  | 95.36(14)  | N(2)#3-Co(1)-N(1)   | 169.87(15) |
| O(2)-Co(1)-O(3)#3  | 168.58(13) | O(2)-Co(1)-O(1W)    | 84.99(12)  |
| O(2)-Co(1)-O(1)    | 87.78(13)  | O(2)-Co(1)-N(1)     | 90.65(13)  |
| O(2)-Co(1)-N(2)#3  | 95.94(13)  | O(3)#3-Co(1)-O(1W)  | 85.68(14)  |
| O(3)#3-Co(1)-O(1)  | 102.13(14) | O(1W)-Co(1)-O(1)    | 170.71(13) |
| N(1)-Co(1)-O(3)#3  | 97.03(13)  | N(1)-Co(1)-O(1W)    | 97.05(14)  |
| N(1)-Co(1)-O(1)    | 77.16(14)  | N(2)#3-Co(1)-O(3)#3 | 77.67(13)  |
| N(2)#3-Co(1)-O(1W) | 91.20(14)  |                     |            |

Symmetry code for **2**: #3 -x+1, -y+1, -z+1**Table S4** The detailed data for hydrogen bonds for complex **2**

|                     |        |              |        |
|---------------------|--------|--------------|--------|
| O(1W)-H(1WA)        | 0.8629 | O(1W)-H(1WB) | 0.8627 |
| H(1WA)-O(1W)-H(1WB) | 103.7  |              |        |

**Table S5** Bond lengths [ $\text{\AA}$ ] and angles [ $^\circ$ ] for complex **3**

|                   |           |                     |            |
|-------------------|-----------|---------------------|------------|
| Co(1)-O(3)        | 2.053(3)  | Co(1)-O(2)#2        | 2.126(3)   |
| Co(1)-O(1)        | 2.076(3)  | Co(1)-O(1W)         | 2.075(3)   |
| Co(1)-N(3)#2      | 2.136(3)  | Co(1)-N(1)          | 2.187(4)   |
| Co(2)-O(5)        | 2.406(2)  | Co(2)-O(5)#3        | 2.406(2)   |
| Co(2)-O(2W)       | 2.058(3)  | Co(2)-O(2W)#3       | 2.058(3)   |
| Co(2)-O(3W)       | 2.031(3)  | Co(2)-O(3W)#3       | 2.031(3)   |
| O(3)-Co(1)-O(2)#2 | 91.82(11) | O(3)-Co(1)-O(1)     | 171.72(11) |
| O(3)-Co(1)-O(1W)  | 87.76(12) | O(3)-Co(1)-N(3)#2   | 89.03(12)  |
| O(3)-Co(1)-N(1)   | 95.11(12) | O(2)#2-Co(1)-N(3)#2 | 76.77(11)  |

|                      |            |                       |           |
|----------------------|------------|-----------------------|-----------|
| O(2)#2-Co(1)-N(1)    | 98.26(12)  | O(1)-Co(1)-O(2)#2     | 90.79(12) |
| O(1)-Co(1)-N(3)#2    | 99.22(12)  | O(1)-Co(1)-N(1)       | 76.73(12) |
| O(1W)-Co(1)-O(2)#2   | 173.37(12) | O(1W)-Co(1)-O(1)      | 90.54(13) |
| O(1W)-Co(1)-N(3)#2   | 99.22(12)  | O(1W)-Co(1)-N(1)      | 88.37(13) |
| N(3)#2-Co(1)-N(1)    | 173.66(13) | O(5)-Co(2)-O(5)#3     | 180.0     |
| O(2W)-Co(2)-O(5)#3   | 95.47(10)  | O(2W)#3-Co(2)-O(5)#3  | 84.53(10) |
| O(2W)#3-Co(2)-O(5)   | 95.47(10)  | O(2W)-Co(2)-O(5)      | 84.53(10) |
| O(2W)-Co(2)-O(2W)#3  | 180.0      | O(2W)#3-Co(2)-O(3W)#3 | 88.33(13) |
| O(2W)#3-Co(2)-O(3W)  | 91.67(13)  | O(2W)-Co(2)-O(3W)#3   | 91.67(13) |
| O(2W)-Co(2)-O(3W)    | 88.33(13)  | O(3W)-Co(2)-O(5)#3    | 88.26(10) |
| O(3W)-Co(2)-O(5)     | 91.74(10)  | O(3W)#3-Co(2)-O(5)    | 88.26(10) |
| O(3W)#3-Co(2)-O(5)#3 | 88.26(10)  | O(3W)-Co(2)-O(3W)#3   | 180.0     |

Symmetry code for **3**: #2 -x+1, -y+2, -z+1 #3 -x-1, -y+1, -z+2

**Table S6** The detailed data for hydrogen bonds for complex **3**

|                     |        |                     |        |
|---------------------|--------|---------------------|--------|
| O(3W)-H(3WA)        | 0.8515 | O(3W)-H(3WB)        | 0.8514 |
| O(2W)-H(2WA)        | 0.8499 | O(2W)-H(2WB)        | 0.8501 |
| O(1W)-H(1WA)        | 0.8502 | O(1W)-H(1WB)        | 0.8501 |
| H(3WA)-O(3W)-H(3WB) | 104.4  | H(2WA)-O(2W)-H(2WB) | 104.5  |
| H(1WA)-O(1W)-H(1WB) | 104.5  |                     |        |

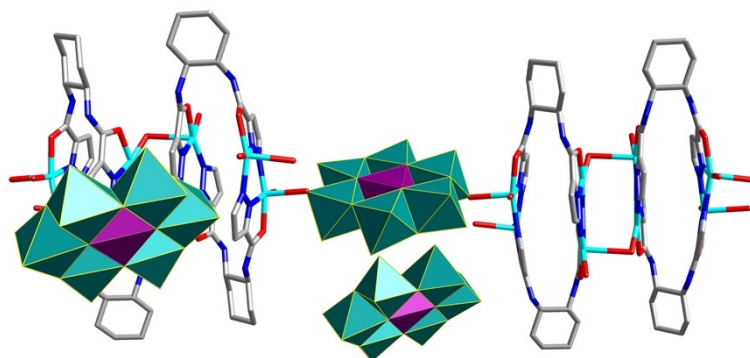

Fig. S1 Schematic diagram of two lattice POMs structure in complex **1**.

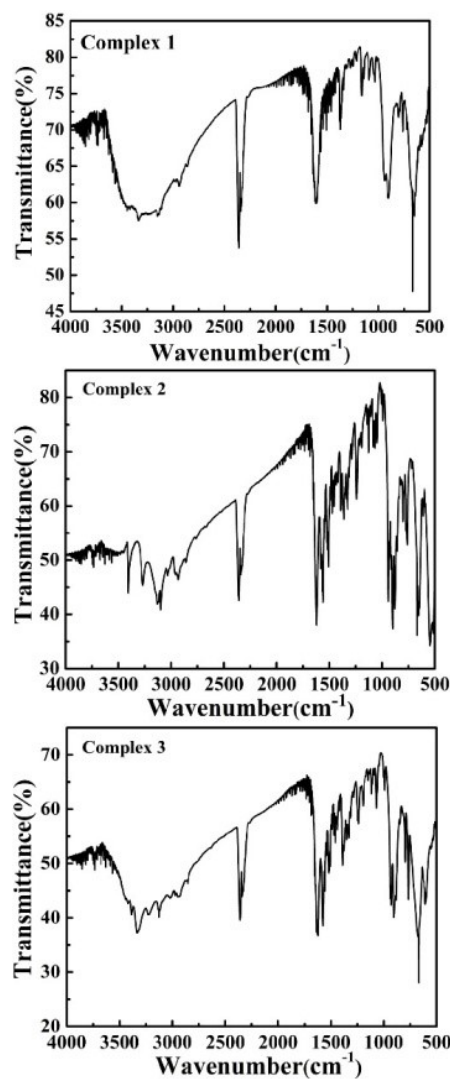

Fig. S2 The IR spectra of complexes **1-3**.
